# Supplementary material for: Epigenetic Regulation of Epidermal Differentiation
Source: Epigenomes. 2021 Jan 1;5(1):1. doi: 10.3390/epigenomes5010001 (PMC8594726; doi:10.3390/epigenomes5010001)
Supplement: Supplementary file 1 [file epigenomes-05-00001-s001.pdf]

| <b>Tissue/cell</b>                   | <b>Modified gene</b>                               | <b>Altered histone level</b> | <b>Effect on keratinocyte/epidermal growth and differentiation</b>                           | <b>Ref.</b> |
|--------------------------------------|----------------------------------------------------|------------------------------|----------------------------------------------------------------------------------------------|-------------|
| Mouse epidermis                      | <b>Setd8</b> knockout <sup>1</sup>                 | H3K20me1 ↓                   | Inhibition of progenitor cell proliferation;<br>Impaired differentiation                     | [10]        |
| Mouse epidermis                      | <b>Ezh2</b> knockout <sup>1</sup>                  | H3K27me3 ↓                   | Inhibition of proliferation;<br>Premature differentiation                                    | [15]        |
| Mouse epidermis;                     | <b>Hdac1/Hdac2</b> knockout <sup>1</sup>           | acH3 ↓                       | Enhanced proliferation;<br>epidermal hyperplasia;<br>disturbed hair follicle differentiation | [19]        |
| Primary human keratinocytes          | <b>Jmjd3</b> knockdown                             | H3K27me3 ↑                   | Blocked differentiation                                                                      | [16]        |
|                                      | <b>Jmjd3</b> overexpression                        | H3K27me3 ↓                   | Enhanced expression of differentiation markers                                               |             |
| Dog nasal epidermis                  | <b>Suv39H2</b> Missense mutation (inactive enzyme) | H3K9me3 ↓                    | Aberrant terminal differentiation                                                            | [18]        |
| HaCaT cells                          | <b>Suv39H1</b> knockout                            | H3K9me3 ↓                    | Increased expression of some differentiation genes                                           | [17]        |
| HaCaT cells; reconstituted epidermis | <b>Jarid1b</b> knockdown                           | H3K4me3 ↑                    | Delayed differentiation                                                                      | [20]        |
|                                      | <b>Jarid1b</b> overexpression                      | H3K4me3 ↓                    | Reduced proliferation;<br>Enhanced differentiation                                           |             |
| Mouse epidermis                      | <b>Ash1l</b> Mutation (reduced expression)         | H3K36me3 ↓                   | Hyperproliferation;<br>Disturbed differentiation                                             | [21]        |

**Table S1. Effect of knockout/down, overexpression or mutation of histone modifying enzymes on keratinocyte/epidermal growth and differentiation**

<sup>1</sup> – conditional knockout in the basal epidermal layer (Cre recombinase expressed under keratin 14 gene promoter); ↓- decrease in modified histone level; ↑- increase in modified histone level.
